# Supplementary material for: Bifunctional Silica‐Coated Superparamagnetic FePt Nanoparticles for Fluorescence/MR Dual Imaging
Source: Hindawi journal article supplement (doi:10.1155/2012/631584), 2012-01-01
Supplement: f1 [file 631584.f1.pdf]

# **Bifunctional silica-coated superparamagnetic FePt nanoparticles for fluorescence/MR dual imaging**

**Syu-Ming Lai<sup>a</sup>, Tsiao-Yu Tsai<sup>a</sup>, Chia-Yen Hsu<sup>a</sup>, Jai-Lin Tsai<sup>b</sup>, Ming-Yuan Liao<sup>a</sup>, Ping-Shan Lai<sup>a\*</sup>**

<sup>a</sup> Department of Chemistry, National Chung Hsing University, 250, Kuo Kuang Rd., Taichung 402,  
Taiwan

<sup>b</sup> Department of Materials Science and Engineering, National Chung Hsing University, 250, Kuo Kuang  
Rd., Taichung 402, Taiwan

**\*To whom the correspondence should be addressed.**

**Mailing address:** Department of Chemistry, National Chung Hsing University,  
250, Kuo-Kuang Road, Taichung 402, Taiwan.

**Tel:** +886-4-22840411 ext. 428

**Fax:** +886-4-22862547

**Email:** [pslai@email.nchu.edu.tw](mailto:pslai@email.nchu.edu.tw)

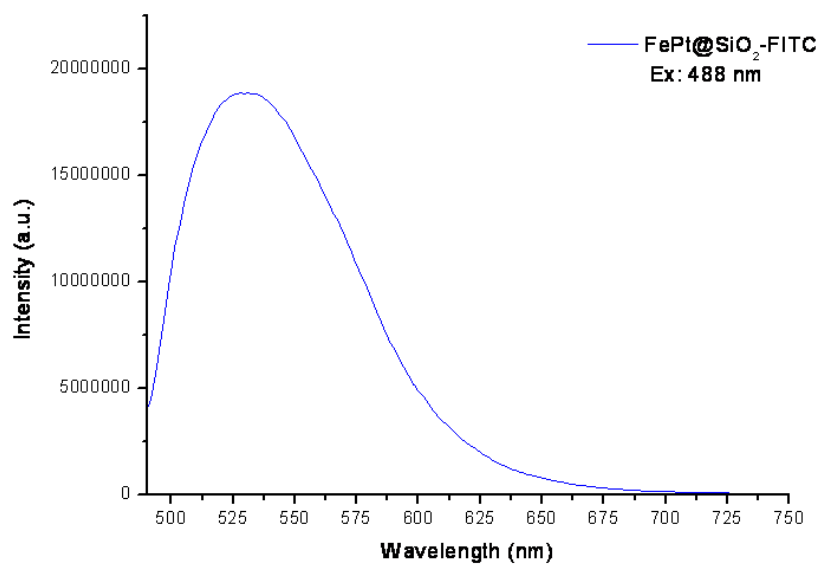

Fig. S1: Fluorescence emission spectrum of FePt@SiO<sub>2</sub>-FITC

|                                     | Mean (mV)    | Area (%) | Width (mV) |
|-------------------------------------|--------------|----------|------------|
| <b>Zeta Potential (mV):</b> 39.9    | Peak 1: 39.9 | 100.0    | 5.44       |
| <b>Zeta Deviation (mV):</b> 5.44    | Peak 2: 0.00 | 0.0      | 0.00       |
| <b>Conductivity (mS/cm):</b> 0.0116 | Peak 3: 0.00 | 0.0      | 0.00       |

**Result quality:** Good

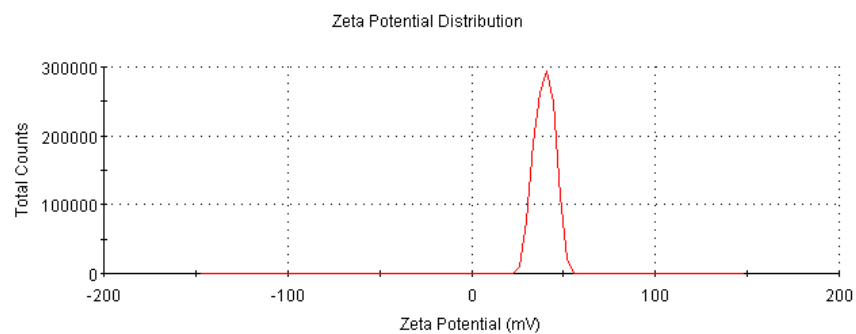

Fig. S2: Zeta potential of FePt@SiO<sub>2</sub>-FITC

Table S1: Longitudinal and transverse relaxation times

|                       | FePt  |       |                       | FePt@SiO <sub>2</sub> -FITC |       |
|-----------------------|-------|-------|-----------------------|-----------------------------|-------|
| Fe concentration (mM) | T1(s) | T2(s) | Fe concentration (mM) | T1(s)                       | T2(s) |
| 0                     | 2.020 | 1.552 | 0                     | 2.020                       | 1.552 |
| 0.0017                | 1.967 | 0.704 | 0.0007                | 1.973                       | 1.436 |
| 0.0034                | 1.918 | 0.375 | 0.0014                | 1.958                       | 1.287 |
| 0.0068                | 1.868 | 0.268 | 0.0028                | 1.935                       | 1.118 |
| 0.0136                | 1.752 | 0.179 | 0.0056                | 1.889                       | 0.805 |
